# Supplementary material for: Circadian disruption-induced microRNAome deregulation in rat mammary gland tissues
Source: PubMed Central journal article supplement (PMC4468328; doi:10.18632/oncoscience.157), 2015-04-26

## Circadian disruption-induced microRNAome deregulation in rat mammary gland tissues

**Supplementary Table S1: Acute photoperiod-shifting schedule.**

| DAY |                     |
|-----|---------------------|
| 1   | Lights off at 13:30 |
| 2   | Lights off at 10:30 |
| 3   | Lights off at 07:30 |
| 4   | Lights off at 04:30 |
| 5   | Lights off at 01:30 |
| 6   | Lights off at 22:30 |

**Supplementary Table S2: Chronic photoperiod-shifting schedule.**

| DAY   |                                    | DAY   |                                    |
|-------|------------------------------------|-------|------------------------------------|
| 1     | Lights off at 13:30                | 33    | Lights off at 19:30                |
| 2     | Lights off at 10:30                | 34    | Lights off at 16:30                |
| 3     | Lights off at 07:30                | 35    | Lights off at 13:30                |
| 4     | Lights off at 04:30                | 36    | Lights off at 10:30                |
| 5     | Lights off at 01:30                | 37    | Lights off at 07:30                |
| 6     | Lights off at 22:30                | 38    | Lights off at 04:30                |
| 7-16  | Re-entrainment-lights off at 19:30 | 39-48 | Re-entrainment-lights off at 01:30 |
| 17    | Lights off at 16:30                | 49    | Lights off at 22:30                |
| 18    | Lights off at 13:30                | 50    | Lights off at 19:30                |
| 19    | Lights off at 10:30                | 51    | Lights off at 16:30                |
| 20    | Lights off at 07:30                | 52    | Lights off at 13:30                |
| 21    | Lights off at 04:30                | 53    | Lights off at 10:30                |
| 22    | Lights off at 01:30                | 54    | Lights off at 07:30                |
| 23-32 | Re-entrainment-lights off at 22:30 |       |                                    |

Supplementary Figure S1: Flow chart illustrating the breakdown of the circadian disruption tissue extraction groups.

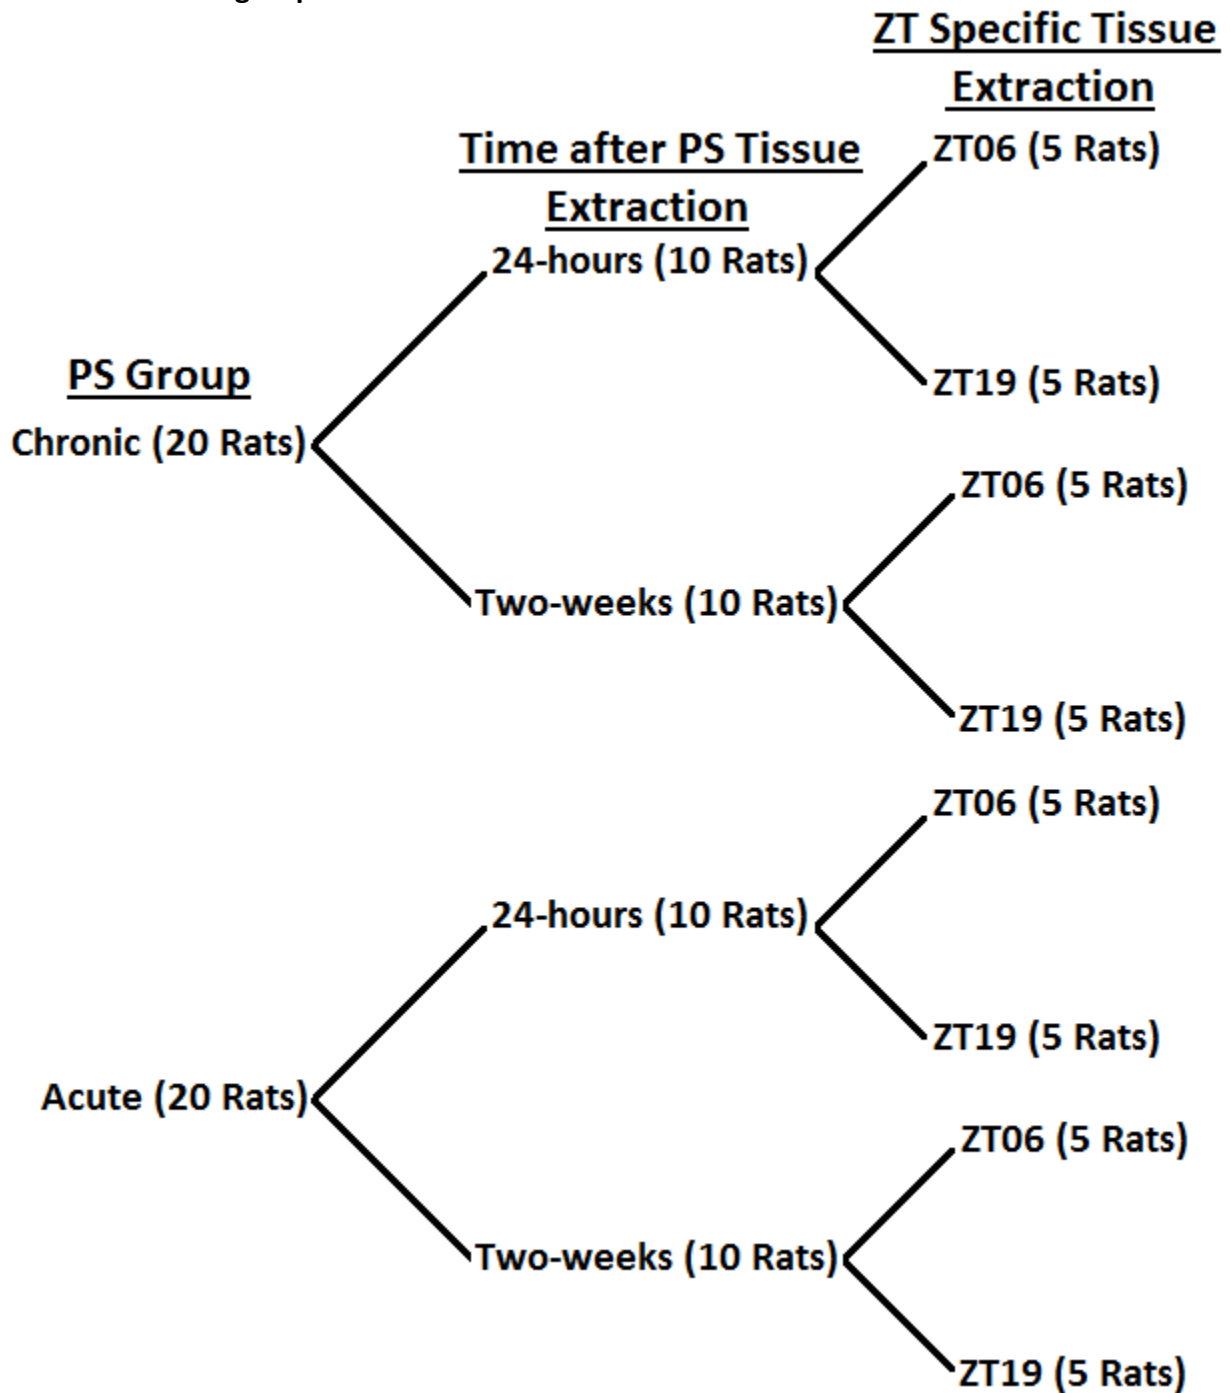

Supplement: oncoscience-02-0428-s001.pdf [file oncoscience-02-0428-s001.pdf]
